# Supplementary material for: Stabilization of divalent Eu2+ in fluorosilicate glass-ceramics via lattice site substitution
Source: Royal Society of Chemistry journal article supplement (doi:10.1039/c8ra06843g), 2018-01-01
Supplement: c8ra06843g1.pdf [file c8ra06843g1.pdf]

## Supporting Information

### Stabilize Divalent $\text{Eu}^{2+}$ in Fluorosilicate Glass-ceramics via Lattice Site Substitution

Chenhao Wang,<sup>a,b</sup> Xiaotong Chen,<sup>a</sup> Xue Luo,<sup>a</sup> Junjie Zhao,<sup>a</sup> Xvsheng Qiao,<sup>a,†</sup> Yong Liu,<sup>a</sup> Xianping Fan,<sup>a</sup> Guodong Qian,<sup>a</sup> Xianghua Zhang,<sup>c</sup> and Gaorong Han<sup>a</sup>

a. State Key Laboratory of Silicon Materials & School of Materials Science and Engineering, Zhejiang University, Hangzhou 310027, China

b. School of Materials Science and Engineering, Tianjin University, Tianjin, 300350, China

c. Laboratory of Glasses and Ceramics, Institute of Chemical Science UMR CNRS 6226, University of Rennes 1, 35042 Rennes, France

† Corresponding author. Email: Qiaoxus@zju.edu.cn

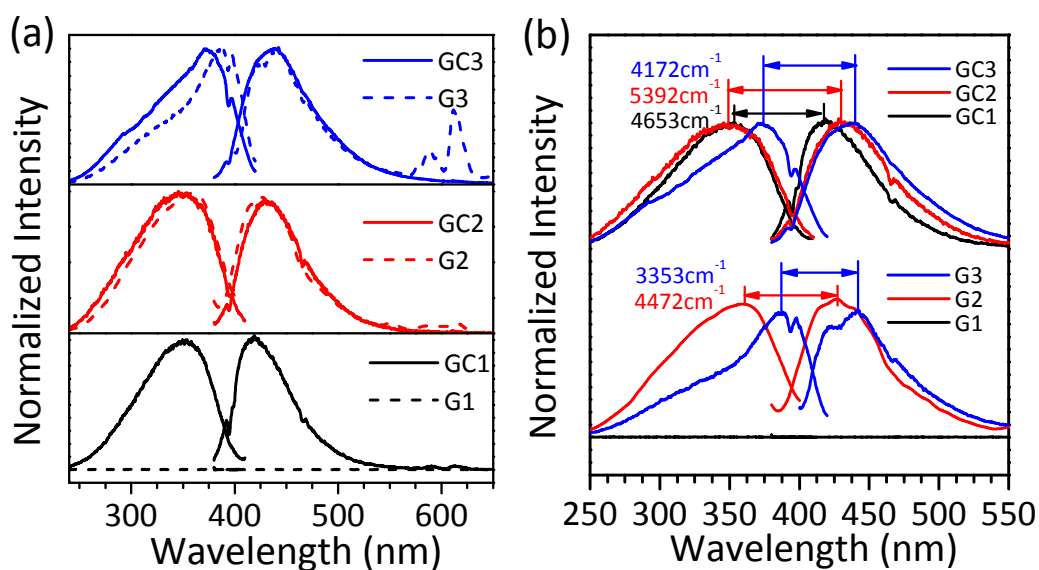

**Figure S1 (a)** Comparison between PL spectra of the glass and glass ceramics samples. The divergence of stokes shift between glass and glass ceramics samples is due to the  $\text{Eu}^{2+}$ -coordination difference between amorphous and crystalline environment. **(b)** Comparison between PL spectra of  $\text{Eu}^{2+}$  doped glasses and glass-ceramics containing MF2 (M = Ca, Sr, Ba) nanocrystals. The stokes shift of  $\text{Eu}^{2+}$  in the glass-ceramics differs with the precipitation of different nanocrystals due to the coordination environmental difference in MF2 (M = Ca, Sr, Ba) nanocrystals.

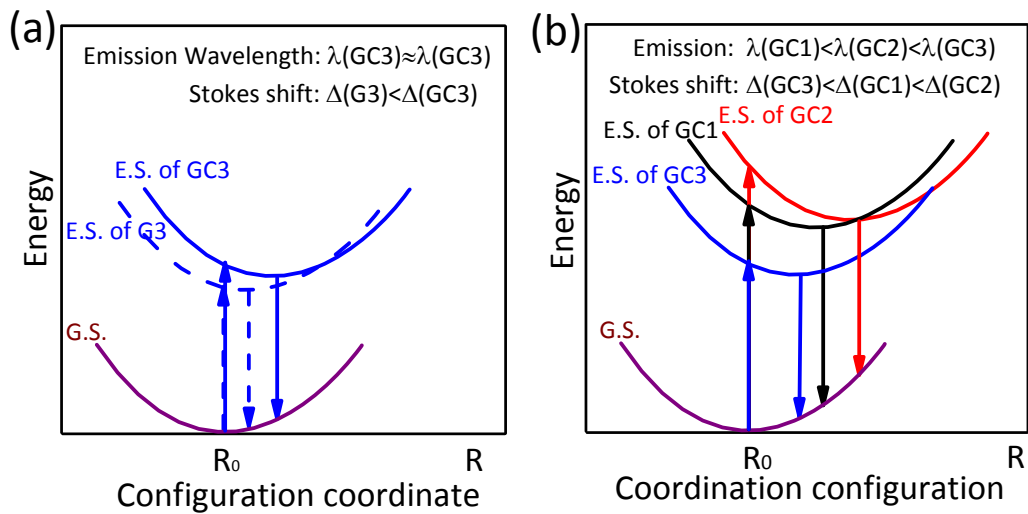

Figure S2 Simplified energy diagrams with configuration coordinate. It revealed that (a) For G3 and GC3,  $\lambda_{ex}(G3) < \lambda_{ex}(GC3)$ ,  $\lambda_{em}(G3) \approx \lambda_{em}(GC3)$ ,  $\Delta_{stokes}(G3) < \Delta_{stokes}(GC3)$ . (b) For GC1-3,  $\lambda_{ex}(GC2) < \lambda_{ex}(GC1) < \lambda_{ex}(GC3)$ ,  $\lambda_{em}(G1) < \lambda_{em}(GC2) < \lambda_{em}(GC3)$ ,  $\Delta_{stokes}(G3) < \Delta_{stokes}(GC1) < \Delta_{stokes}(GC2)$ .

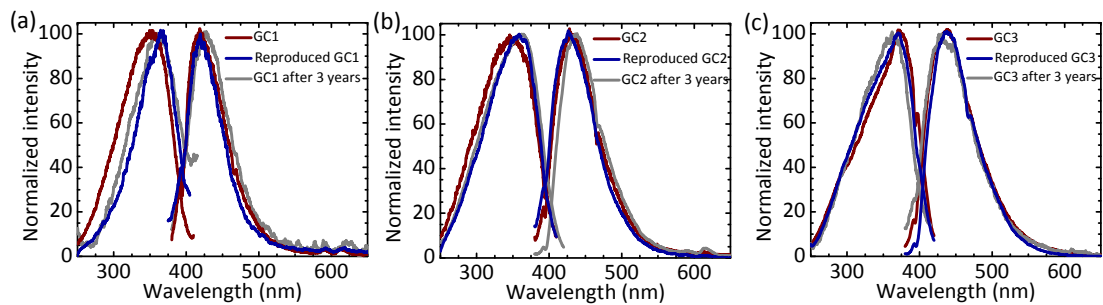

Figure S3 The reproducibility and luminescence stability of  $\text{Eu}^{2+}$  doping glass ceramics samples prepared by lattice substitution. (a) PL spectra of GC1, reproduced GC1 and GC1 after 3 years. (b) PL spectra of GC2 reproduced GC2 and GC2 after 3 year. (c) PL spectra of GC3, reproduced GC3 and GC3 after 3 years.
